10. Hamilton, W. K., McDonald, J. S., Fischer, H. W., and Bethards, R.: Postoperative respiratory complications, a comparison of arterial gas tensions, radiographs and physical examination, *ANESTHESIOLOGY* 25: 607, 1964.
11. Marshall, B. E.: Physiological shunting and deadspace during spontaneous respiration with halothane-oxygen anesthesia and the influence of intubation on the physiological deadspace, *Brit. J. Anaesth.* 38: 912, 1966.
12. Bergman, N. A.: Components of the alveolar-arterial oxygen tension difference in anesthetized man, *ANESTHESIOLOGY* 28, 517, 1967.
13. Hedley-Whyte, J., Laver, M. B., and Bendixen, H. H.: Effect of changes in tidal ventilation on physiologic shunting, *Am. J. Physiol.* 206: 891, 1964.
14. Cole, R. B., and Bishop, J. M.: Effect of varying inspired  $O_2$  tension on alveolar-arterial  $O_2$  tension difference in man, *J. Appl. Physiol.* 18: 1043, 1963.
15. Pierce, J. A., and Garofalo, M.: Preoperative medication and its effect on blood gases, *J.A.M.A.* 194: 487, 1965.
16. Deutsch, S., Linde, H. W., Dripps, R. D., and Price, H. L.: Circulatory and respiratory actions of halothane in normal man, *ANESTHESIOLOGY* 23: 631, 1962.
17. Elebute, E. A., Masood, A., Faulkner, C. S., Yu, P. N., and Schwartz, S. I.: The effects of acute and chronic atelectasis on pulmonary hemodynamics, *J. Thorac. Cardiovasc. Surg.* 52: 292, 1966.
18. Rahn, H., and Bahnsen, H. T.: Effect of unilateral hypoxia on gas exchange and calculated pulmonary blood flow in each lung, *J. Appl. Physiol.* 6: 105, 1953.
19. Hedley-Whyte, J., Pontoppidan, J., and Jocelyn Morris, M.: The response of patients with respiratory failure and cardiopulmonary disease to different levels of constant volume ventilation, *J. Clin. Invest.* 45: 1543, 1966.
20. Finley, T. N., Hill, T. R., and Bonica, J. J.: Effect of intrapleural pressure on pulmonary shunt through atelectatic dog lung, *Amer. J. Physiol.* 205: 1187, 1963.
21. Fairley, H. B.: The oxygen tightrope, *Can. Anaesth. Soc. J.* 13: 98, 1966.
22. Williams, M. H., Jr.: Alveolar-arterial oxygen pressure gradient in normal dogs, *Amer. J. Physiol.* 173: 77, 1953.
23. Suskind, M.: Alveolar-arterial  $O_2$  and  $CO_2$  differences in the dog breathing air and low  $O_2$  mixtures, *Amer. J. Physiol.* 177: 227, 1954.
24. Colgan, F. J., Whang, T. B., and Gillies, A. J.: Atelectasis and pneumothorax: Effect on lung function and shunting, *ANESTHESIOLOGY* 29: 923, 1968.
25. Watson, W. E.: Some observations on dynamic lung compliance during intermittent positive pressure respiration, *Brit. J. Anaesth.* 34: 153, 1962.
26. Colgan, F. J.: Relationship of changing bronchial caliber to respiration in the dog, *J. Appl. Physiol.* 19: 803, 1964.

## Drugs

**LOCAL ANESTHETICS** The effects of four local anesthetics, procaine, lidocaine, tetracaine and dibucaine, on the soleus neuromuscular preparation of the cat *in vivo* were studied. All anesthetic agents, when injected intra-arterially or intravenously, depressed the posttetanic potentiation of the soleus muscle and abolished the neural repetitive afterdischarge of the motor nerve terminals. Lidocaine was 1.5, tetracaine 10, and dibucaine 15 times more potent than procaine in depressing posttetanic potentiation. Recovery of posttetanic potentiation was rapid following procaine and lidocaine, but it was prolonged after tetracaine and dibucaine. Since posttetanic potentiation and posttetanic repetitive activity are neural events and local anesthetics depressed them without depressing the transmission of single twitches, it was concluded that local anesthetics act by selective depression of the motor nerve terminal. The possibility of a postfunctional effect of local anesthetics is considered, but, according to the dose-response relationship, it occurs only after injection of large doses. (Usabiaga, J. E., and Standaert, F.: *The Effects of Local Anesthetics on Motor Nerve Terminals*, *J. Pharmacol. Exper. Therap.* 159: 353 (Feb.) 1968.)
